# Supplementary material for: Depletion of FOXP3+ regulatory T cells promotes hypercholesterolemia and atherosclerosis
Source: JCI journal article supplement (doi:10.1172/jci63891), 2013-02-15
Supplement: sd1 [file 1]

# **Selective depletion of Foxp3<sup>+</sup> regulatory T cells promotes hypercholesterolemia and exacerbates experimental atherosclerosis**

**Roland Klingenberg, Norbert Gerdes, Robert M. Badeau, Anton Gisterå, Daniela Strodthoff, Daniel**

**F. J. Ketelhuth, Anna M. Lundberg, Mats Rudling, Stefan K. Nilsson, Gunilla Olivecrona, Stefan**

**Zoller, Christine Lohmann, Thomas F. Lüscher, Matti Jauhiainen, Tim Sparwasser, Göran K. Hansson**

***Supplemental Figures***

s1A

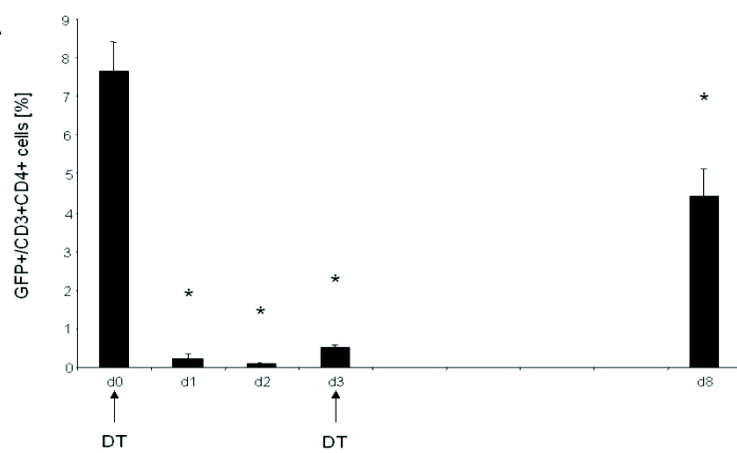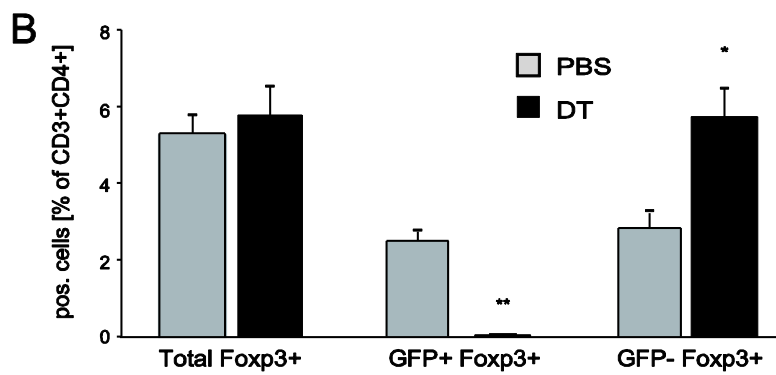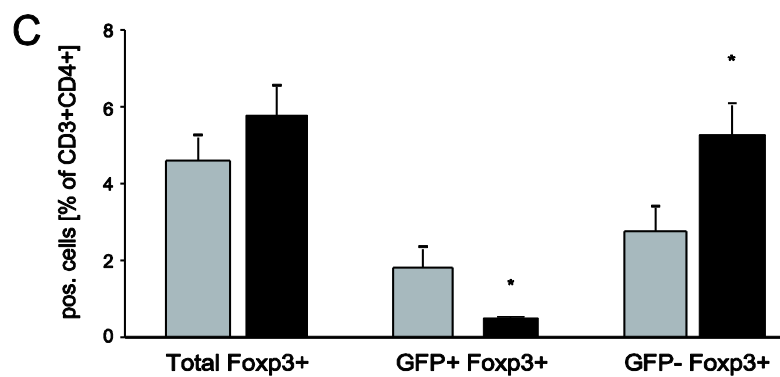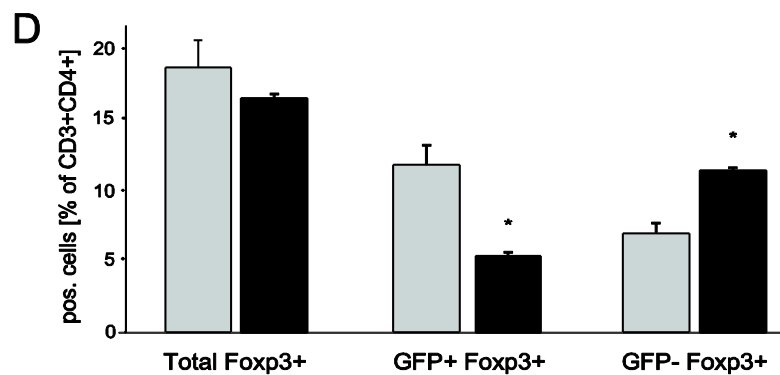

**Supplemental Figure 1. Dosing study and kinetics of transgenic Treg depletion in DERE*G/Ldlr*<sup>-/-</sup> bone marrow chimeras.**

(A) Pilot experiment: Kinetics of transgenic Treg depletion after DT injection. Percent eGFP<sup>+</sup> cells in CD3<sup>+</sup>CD4<sup>+</sup> gate at different time points after one DT injection (FACS analysis). Diphtheria toxin (DT; 6.25 ng/kg body weight; i.p.) was administered to DERE*G* mice at the indicated time points. eGFP<sup>+</sup> cells were quantified within the CD3<sup>+</sup>CD4<sup>+</sup> population by FACS analysis of peripheral blood. \*p<0.05 vs d0; n=5.

(B-D) Depletion of eGFP-transgenic cells in relation to Foxp3<sup>+</sup> within the CD3<sup>+</sup>CD4<sup>+</sup> population in peripheral blood of DERE*G/Ldlr*<sup>-/-</sup> bone marrow chimeras treated with DT or PBS drawn at 10 days (B), 30 days (C) and 60 days (D). Data are generated from CD3<sup>+</sup>CD4<sup>+</sup> cells (n = 7-8 mice per group) using FACS analysis.

s2A

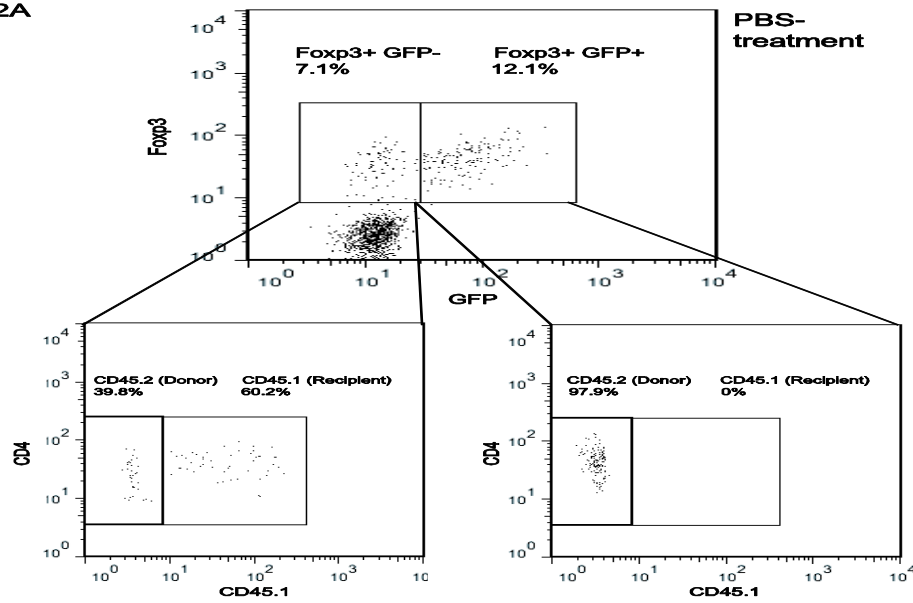

B

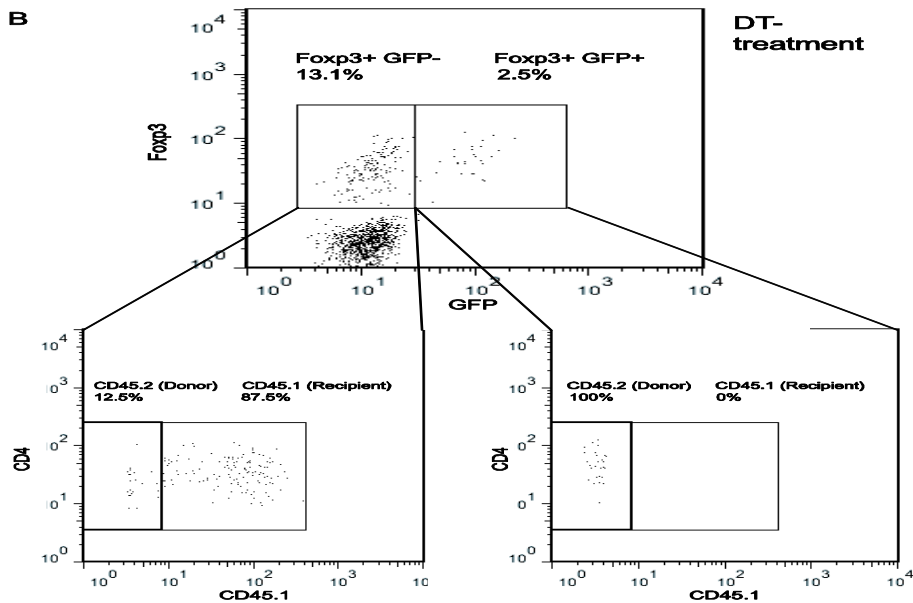

**Supplemental Figure 2. Regeneration of GFP<sup>-</sup> Foxp3<sup>+</sup> Treg from host pool.**

CD45.2<sup>+</sup> bone marrow was transplanted into *Ldlr*<sup>-/-</sup> mice carrying the CD45.1 surface marker.

(A) Representative FACS plot of spleen cells from a PBS-treated chimeric mouse. The majority of Foxp3<sup>+</sup> cells are GFP<sup>+</sup> derived from CD45.2<sup>+</sup> donor bone marrow.

(B) Representative FACS plot of spleen cells from a DT-treated chimeric mouse. Most of the Foxp3<sup>+</sup> GFP<sup>+</sup> cells have disappeared in DT-treated animals and the remaining Foxp3<sup>+</sup> cells are GFP<sup>-</sup> derived from the CD45.1<sup>+</sup> recipient population.

s3A

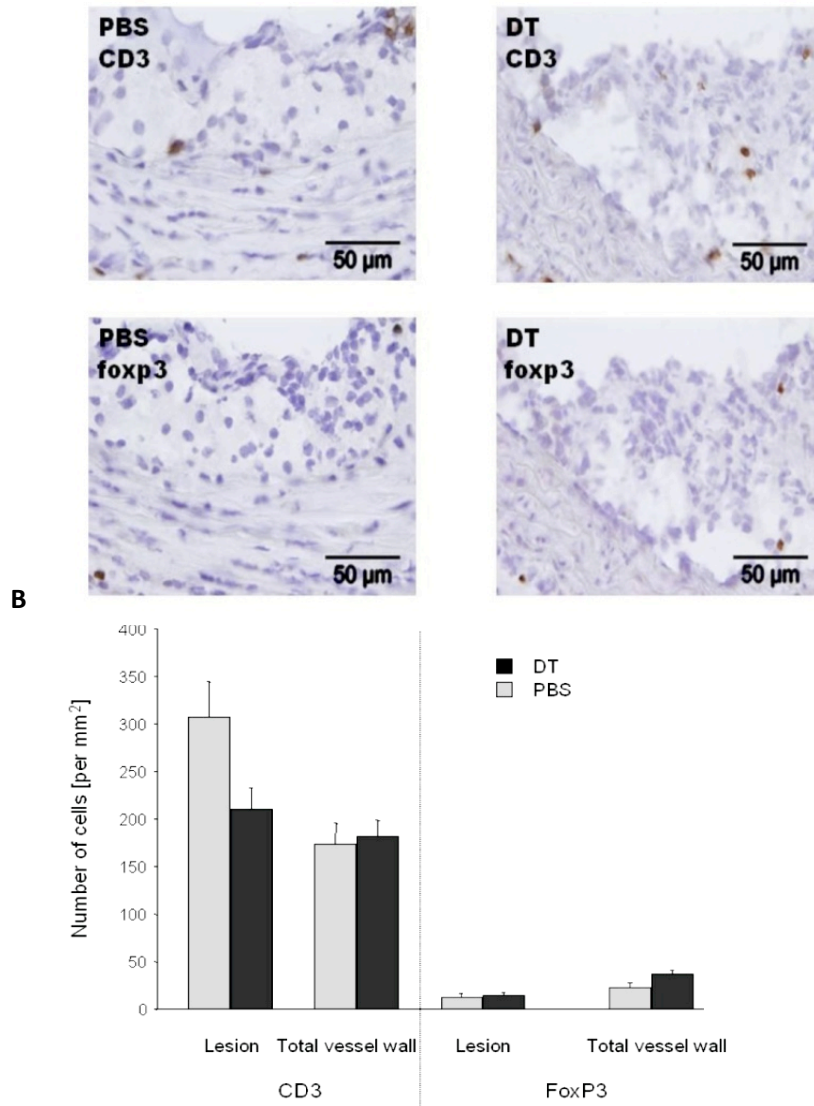

**Supplemental Figure 3. T cells including Treg are present in atheroma and vascular wall.**

(A) Representative micrographs of immunohistochemical staining of the aortic sinus of DERE $G/Ldlr^{-/-}$  chimeric mice treated with either PBS or DT and fed an atherogenic diet for 8 weeks. Sections were stained for total T cells (CD3) and Treg (Foxp3).

(B) Quantitative analysis of immunostaining for CD3 and Foxp3 in lesions and total vessel wall. Data show stained cells per cross-section area. N=12 (PBS) and n=8 (DT), respectively.

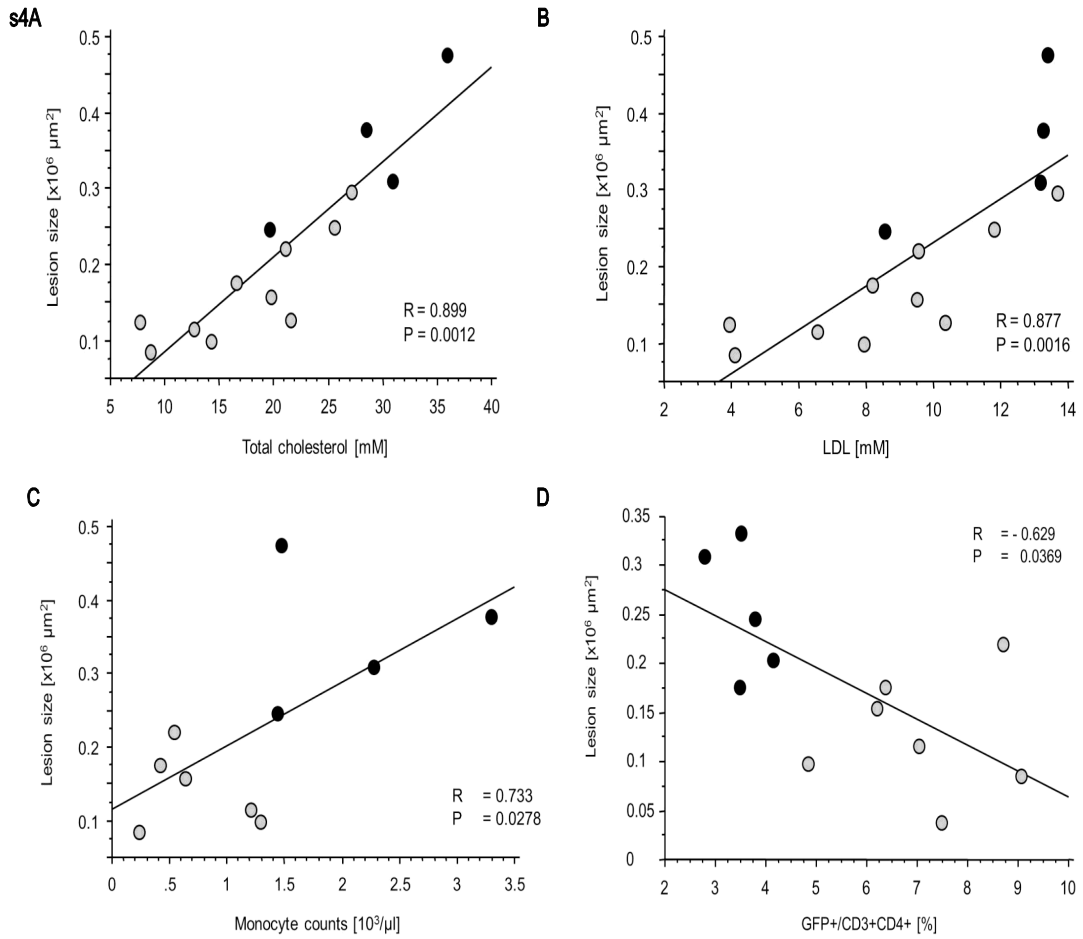

**Supplemental Figure 4. Correlations with lesion size in aorta.**

Distribution of values for individual animals are shown.

(A) Lesion size vs. total plasma cholesterol (mM), (B) plasma LDL cholesterol (mM), (C) blood monocyte count (cells  $\times 10^3/\mu\text{l}$ ) and (D) eGFP<sup>+</sup> Treg (percent of all CD3<sup>+</sup>CD4<sup>+</sup> cells in spleen). DT, black circles, PBS, grey circles.

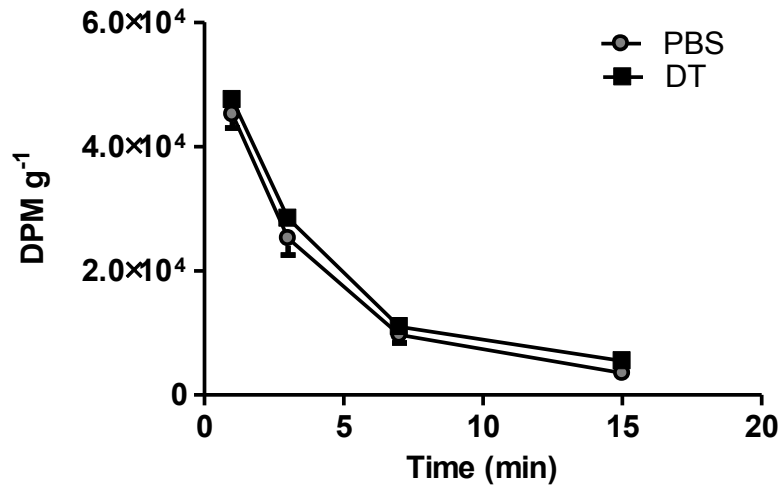

**Supplemental Figure 5. Kinetics of chylomicron [<sup>3</sup>H]-triglyceride clearance from blood.**

In vivo turnover of [<sup>3</sup>H]triglyceride/[<sup>14</sup>C]retinol chylomicron particles in chimeric DERE<sup>G</sup>/*Ldlr*<sup>-/-</sup> mice treated for 8 weeks with PBS or DT. Radioactivity was measured in the [<sup>3</sup>H] channel at the indicated time points. DPM, disintegrations per minute. N= 6 PBS; n=8 DT. Mean ± S.E.M. are shown.

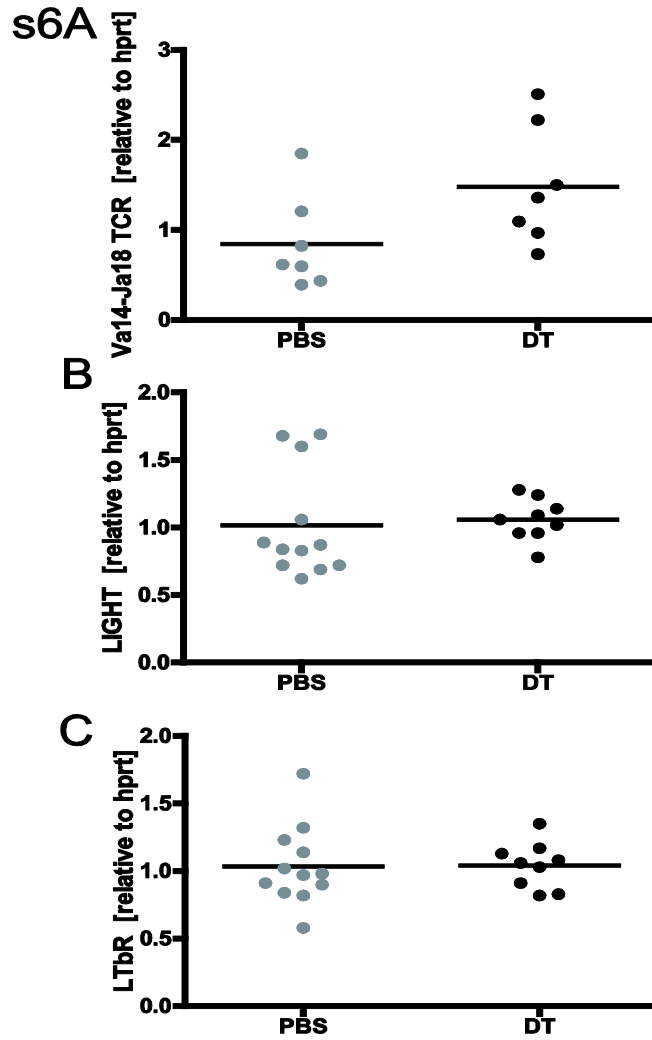

**Supplemental Figure 6. Treg depletion did not affect the LIGHT/NKT/lipase pathway.**

Quantitative real-time RT-PCR analysis of liver mRNA from DEREG/*Ldlr*<sup>-/-</sup> chimeric mice treated for 8 weeks with DT or PBS. Transcript levels were normalized to HPRT. \*p<0.05. N=6 per group. (A) T cell receptor Va14-Ja18 specific for iNKT cells; (B) LIGHT (TNFSF14), (C) Lymphotoxin-βreceptor. Hepatic lipase mRNA is shown in Figure 7 of the core manuscript.



S 7A

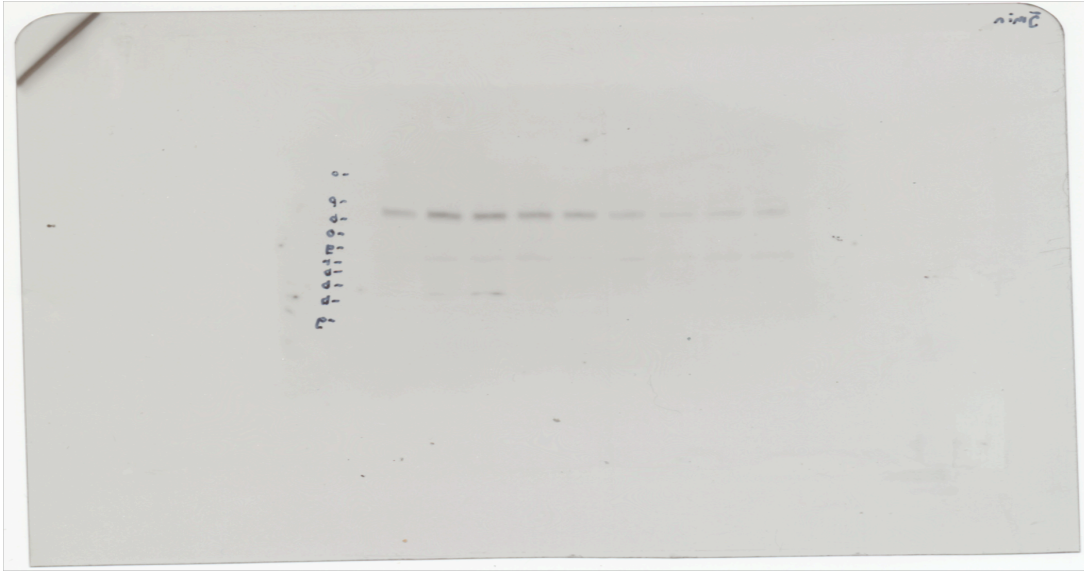

S 7B

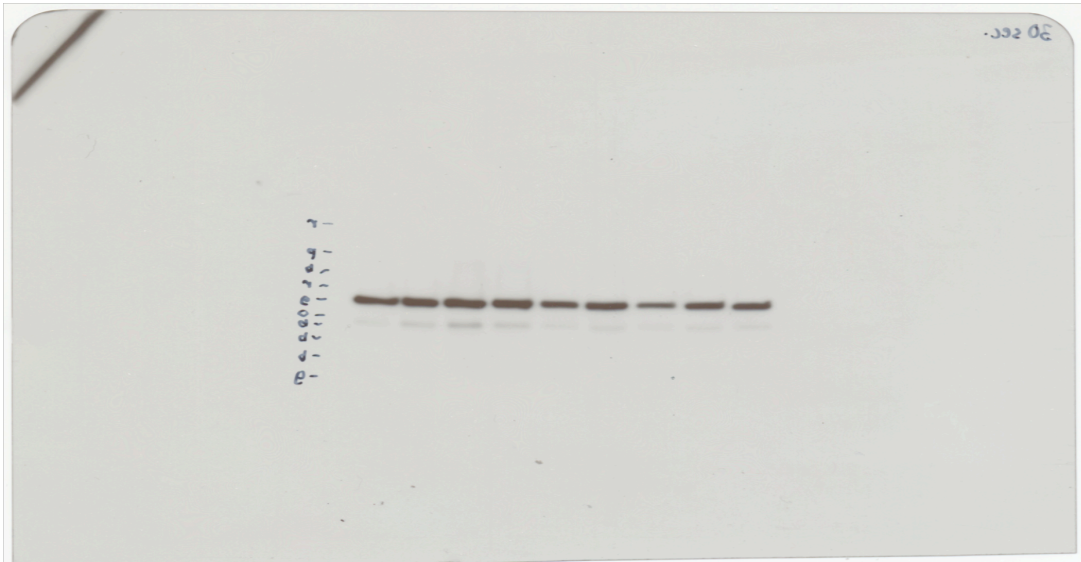

**Supplemental Figure 7. Hepatic expression of sortilin-1 is significantly decreased upon Treg depletion.**

Full uncut immunoblots of liver tissue stained for sortilin-1 (A) and tubulin (B). The left 5 lines show PBS treated control mice, the following 4 lanes DT treated ones. Annotations are provided in Figure 8.
